# Supplementary material for: Boron nitride embedded in chitosan hydrogel as a hydrophobic, promising metal-free, sustainable antibacterial material
Source: Royal Society of Chemistry journal article supplement (doi:10.1039/d3ma00445g), 2023-01-01
Supplement: d3ma00445g1.pdf [file d3ma00445g1.pdf]

## **Boron nitride embedded in chitosan hydrogel as hydrophobic, promising metal-free, sustainable antibacterial materials**

Nisrine Hammi,<sup>a,b</sup> Marta Kędzierska,<sup>c</sup> Natalia Wrońska,<sup>d</sup> Nadia Katir,<sup>a</sup> Jeremy Dhainaut,<sup>b</sup> Sebastien Royer,<sup>b</sup> Katarzyna Lisowska,<sup>d</sup> Maria Bryszewska,<sup>c</sup> Katarzyna Miłowska,<sup>c</sup> Abdelkrim El Kadib.<sup>a,\*</sup>

<sup>a</sup> Euromed Research Center, Engineering Division, Euro-Med University of Fes (UEMF), Route de Meknes, Rond-point de Bensouda, 30070, Fès, Morocco.

<sup>b</sup> Univ. Lille, CNRS, Centrale Lille, Univ. Artois, UMR 8181 – UCCS – Unité de Catalyse et Chimie du Solide, F-59000 Lille, France.

<sup>c</sup> Department of General Biophysics, Faculty of Biology and Environmental Protection, University of Lodz, 141/143 Pomorska Street, 90-236 Lodz, Poland

<sup>d</sup> Department of Industrial Microbiology and Biotechnology, Faculty of Biology and Environmental Protection, University of Lodz, 12/16 Banacha Street, 90-236 Lodz, Poland

\* Corresponding authors: email address: [a.elkadib@ueuromed.org](mailto:a.elkadib@ueuromed.org)

### **Contents**

|                                                                                 |   |
|---------------------------------------------------------------------------------|---|
| S1. DRIFT spectra obtained for CS-BN <sub>x-f</sub> films.....                  | 2 |
| S2. XRD diffractograms obtained for CS-BN <sub>x-f</sub> films.....             | 3 |
| S3. TGA analysis curves obtained for CS-BN <sub>x-f</sub> films under air ..... | 4 |
| S4. SEM analysis .....                                                          | 5 |
| S5. Chemical properties of the synthesized materials .....                      | 6 |
| S6. Tensile strength comparison of some polymer-boron nitride composites.....   | 7 |

## S1. DRIFT spectra obtained for CS-BN<sub>x</sub>-f films

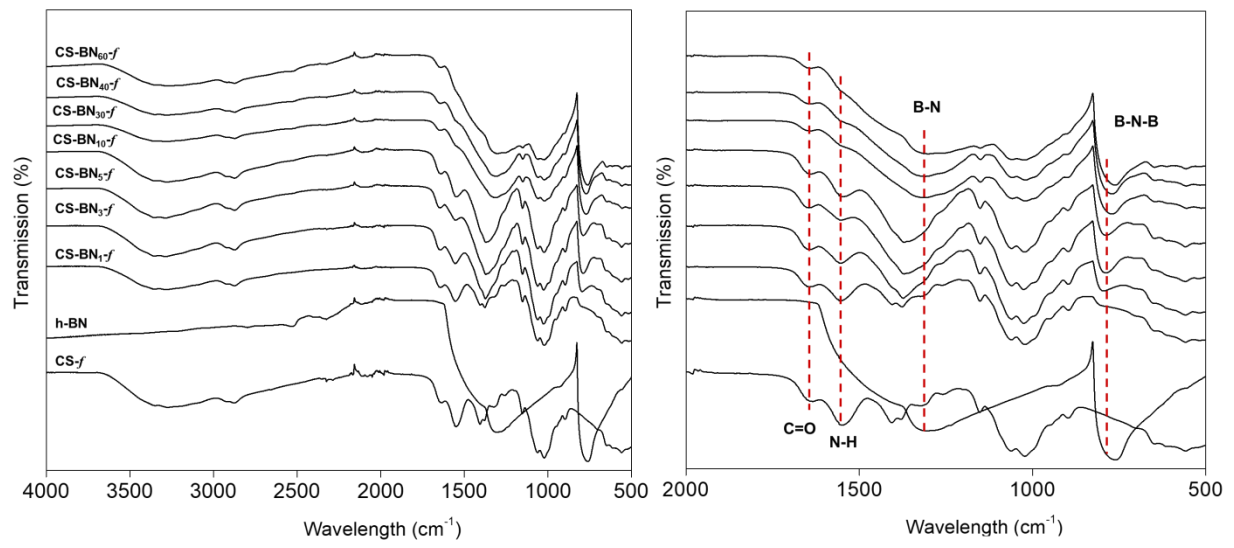

## S2. XRD diffractograms obtained for CS-BN<sub>x</sub>-f films

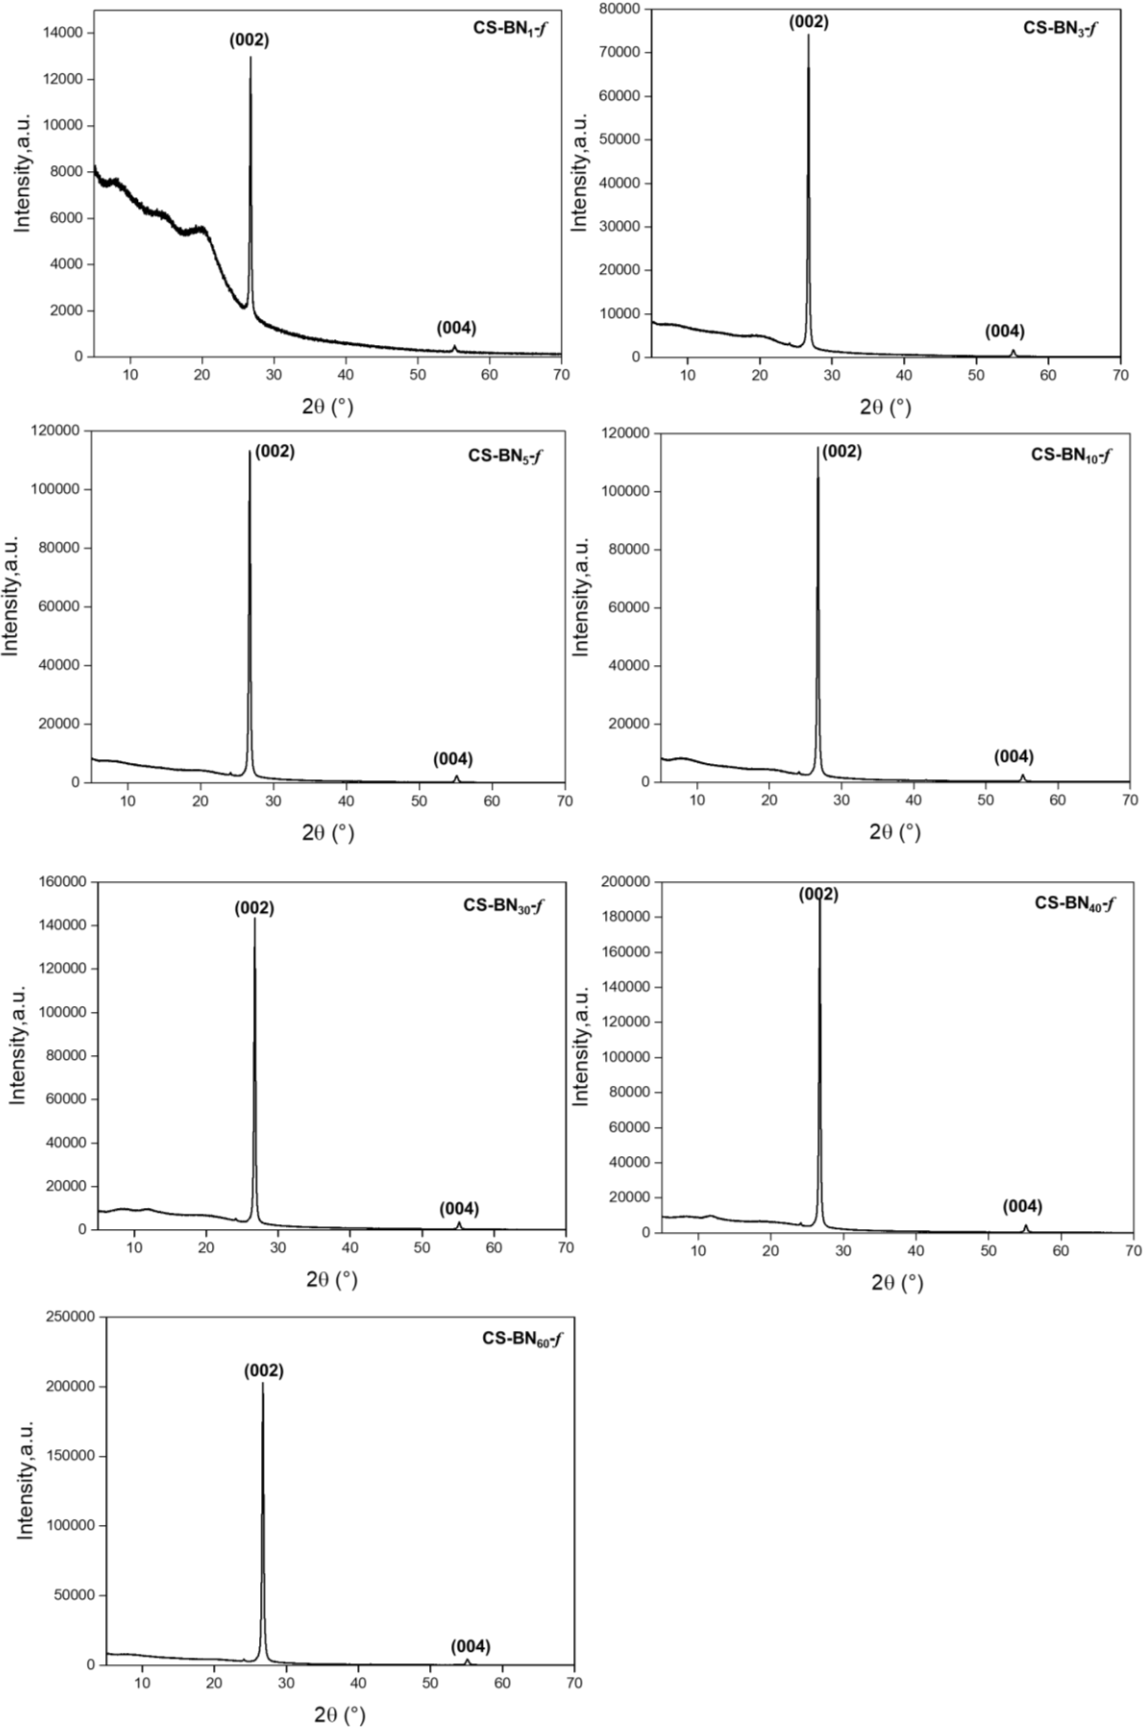

### S3. TGA analysis curves obtained for CS-BN<sub>x</sub>-f films under air

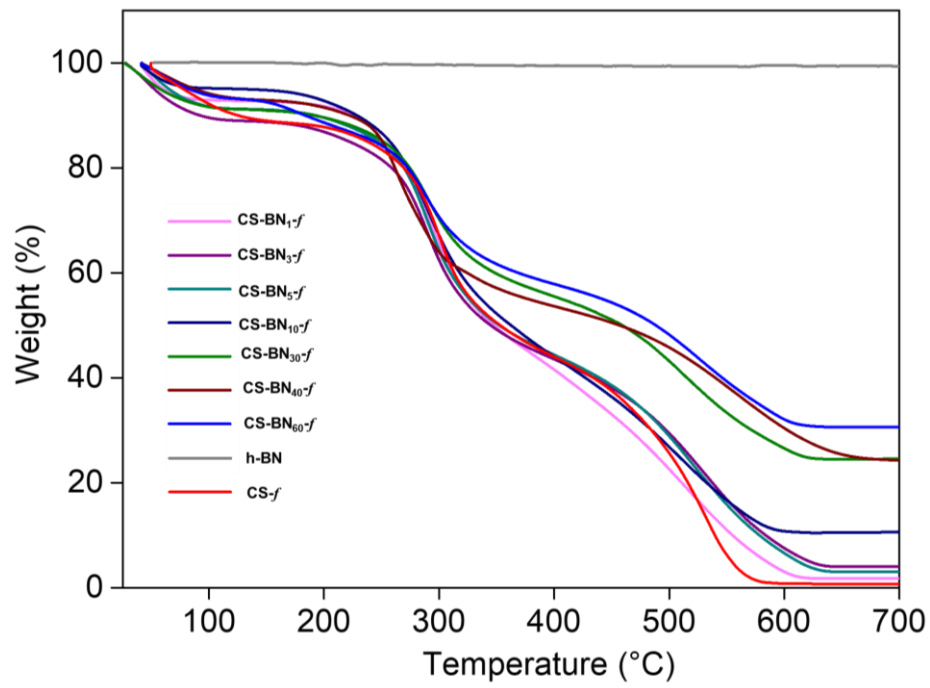

#### S4. SEM and element Mapping images obtained for CS-BN<sub>x</sub>-f films

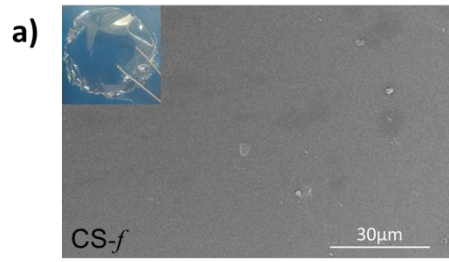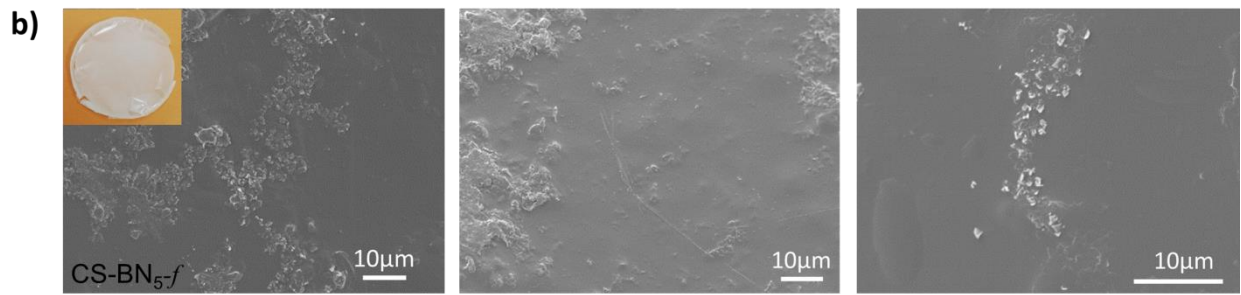

## S5. Chemical properties of the synthesized materials

Table S5: Chemical properties of the synthesized materials

| Sample                         | Thickness ( | Water contact angle (°) | Residual mass (%) |
|--------------------------------|-------------|-------------------------|-------------------|
| CS- <i>f</i>                   |             | 67.4 ± 2.34             | 0                 |
| h-BN                           |             |                         | 100               |
| CS-BN <sub>1</sub> - <i>f</i>  | 6           | 80.0 ± 5.05             | 1.54              |
| CS-BN <sub>3</sub> - <i>f</i>  | 10          | 87.7 ± 4.36             | 2.5               |
| CS-BN <sub>5</sub> - <i>f</i>  | 10          | 87.2 ± 4.05             | 3                 |
| CS-BN <sub>10</sub> - <i>f</i> | 13          | 83.8 ± 3.41             | 10                |
| CS-BN <sub>30</sub> - <i>f</i> | 16          | 96.2 ± 1.93             | 24                |
| CS-BN <sub>40</sub> - <i>f</i> | 20          | 99.7 ± 2.23             | 25                |
| CS-BN <sub>60</sub> - <i>f</i> | 23          | 102.9 ± 2.42            | 30                |

## S6. Tensile strength comparison of some polymer-boron nitride composites

Table S6: Tensile strength comparison of some polymer-boron nitride composites

| Material                | h-BN loading (%) | Tensile strength (MPa) | Application                                           | REF       |
|-------------------------|------------------|------------------------|-------------------------------------------------------|-----------|
| CS-BN <sub>x</sub> -f   | 30               | 119                    | Antibacterial                                         | This work |
| CNF/BAH-NH <sub>2</sub> | 50               | 35.93                  | -                                                     | [1]       |
| Cellulose/BNN-OH        | 50               | 226                    | -                                                     | [2]       |
| CNF/BNNOH               | 60               | 45                     | -                                                     | [3]       |
| Chitin/BNNs             | 10               | 85                     | Dielectric energy storage.                            | [4]       |
| CS-5                    | 5                | 91                     | Cell viability                                        | [5]       |
| PDMC/BNNs               | 1                | 70                     | -                                                     | [6]       |
| CNF/f-BNNS              | 70               | 66                     | Electronic devices                                    | [7]       |
| FBN/PVA                 | 60               | 112                    | Thermal management in electronics                     | [8]       |
| BNNPs/NFC               | 40               | 74.6                   | Absorption and separation of MG and rhodamine B dyes. | [9]       |
| f-BNNS/PVA              | 5                | ~11.37                 | Portable electronics                                  | [10]      |

- [1] W. Lee and J. Kim, *Composites Science and Technology*, 2020, 200, 108424.
- [2] H. Tu, K. Xie, X. Lin, R. Zhang, F. Chen, Q. Fu, B. Duan and L. Zhang, *J. Mater. Chem. A*, 2021, 9, 10304–10315.
- [3] K. Wu, P. Liao, R. Du, Q. Zhang, F. Chen and Q. Fu, *J. Mater. Chem. A*, 2018, 6, 11863–11873.
- [4] J. Wang, H. Chen, X. Li, C. Zhang, W. Yu, L. Zhou, Q. Yang, Z. Shi and C. Xiong, *Chemical Engineering Journal*, 2020, 383, 123147.
- [5] K. Behera, M. Kumari, Y.-H. Chang and F.-C. Chiu, *International Journal of Biological Macromolecules*, 2021, 186, 135–144.
- [6] M. Guo, Y. Wu, S. Xue, Y. Xia, R. Zhang, D. Liu, W. Lei and T. Zhang, *Materials Letters*, 2019, 242, 127–130.
- [7] K. Wu, J. Fang, J. Ma, R. Huang, S. Chai, F. Chen and Q. Fu, *ACS Appl. Mater. Interfaces*, 2017, 9, 30035–30045.
- [8] J. Wang, Y. Wu, Y. Xue, D. Liu, X. Wang, X. Hu, Y. Bando and W. Lei, *J. Mater. Chem. C*, 2018, 6, 1363–1369.
- [9] Q. Li, Z. Xue, J. Zhao, C. Ao, X. Jia, T. Xia, Q. Wang, X. Deng, W. Zhang and C. Lu, *Chemical Engineering Journal*, 2020, 383, 123101.
- [10] C.-G. Yin, Y. Ma, Z.-J. Liu, J.-C. Fan, P.-H. Shi, Q.-J. Xu and Y.-L. Min, *Polymer*, 2019, 162, 100–107.
